# Supplementary material for: Inverse opal manganese-doped tungsten trioxide as a high-performance Fenton-like photocatalyst for levofloxacin degradation
Source: Royal Society of Chemistry journal article supplement (doi:10.1039/d3nj05798d), 2024-01-01
Supplement: d3nj05798d1.pdf [file d3nj05798d1.pdf]

## Supporting Information

### Inverse opal manganese-doped Tungsten trioxide as a high-performance Fenton-like photocatalyst for levofloxacin degradation

Nan Jia<sup>a,b</sup>, Yizhou Wu<sup>a,b</sup>, Xinxi Zhang<sup>a,b</sup>, Liang Zhou<sup>a,b,c,d</sup>, Juying Lei<sup>a,b,c,d,\*</sup>, Tan Phong Nguyen<sup>e</sup>, Jinlong Zhang<sup>d,f</sup>, Yongdi Liu<sup>a,b,d,\*</sup>

<sup>a</sup> National Engineering Research Center of Industrial Wastewater Detoxication and Resource Recovery, East China University of Science and Technology, 130 Meilong Road, Shanghai 200237, P. R. China. Email: leijuying@ecust.edu.cn

<sup>b</sup> State Environmental Protection Key Laboratory of Environmental Risk Assessment and Control on Chemical Process, East China University of Science and Technology, 130 Meilong Road, Shanghai 200237, P. R. China. Email: ydliu@ecust.edu.cn

<sup>c</sup> Shanghai Institute of Pollution Control and Ecological Security, Shanghai 200092, P.R. China

<sup>d</sup> Shanghai Engineering Research Center for Multi-media Environmental Catalysis and Resource Utilization, East China University of Science and Technology, 130 Meilong Road, Shanghai 200237, P. R. China

<sup>e</sup> Faculty of Biology and Environment, Ho Chi Minh City University of Industry and Trade (HUIT), 140 Le Trong Tan Street, Tay Thanh Ward, Tan Phu District, Ho Chi Minh City, 70000, Vietnam

<sup>f</sup> Key Laboratory for Advanced Materials and Joint International Research Laboratory of Precision Chemistry and Molecular Engineering, Feringa Nobel Prize Scientist Joint Research Center, School of Chemistry and Molecular Engineering, East China University of Science and Technology, 130 Meilong Road, Shanghai 200237, P. R. China

## 1. Tables

**Table S1.** Reagents.

| Name                                     | Molecular formula<br>/abbreviation                                                                | Purities | Manufacturer          |
|------------------------------------------|---------------------------------------------------------------------------------------------------|----------|-----------------------|
| Anhydrous ethanol                        | C <sub>2</sub> H <sub>6</sub> O                                                                   | AR       | Aladdin               |
| Sodium dodecyl sulphate                  | C <sub>12</sub> H <sub>25</sub> O <sub>4</sub> NaS                                                | GC       | Macklin               |
| Potassium persulfate                     | K <sub>2</sub> S <sub>2</sub> O <sub>8</sub>                                                      | AR       | Macklin               |
| Styrene                                  | C <sub>8</sub> H <sub>8</sub>                                                                     | AR       | Macklin               |
| Methanol                                 | CH <sub>4</sub> O                                                                                 | AR       | Aladdin               |
| Ammonium metatungstate                   | (NH <sub>4</sub> ) <sub>6</sub> H <sub>2</sub> W <sub>12</sub> O <sub>40</sub> .xH <sub>2</sub> O | AR       | Macklin               |
| Manganese chloride<br>tetrahydrate       | MnCl <sub>2</sub> ·4H <sub>2</sub> O                                                              | AR       | Rhawn                 |
| Levofloxacin                             | C <sub>18</sub> H <sub>20</sub> FN <sub>3</sub> O <sub>4</sub> /LVX                               | AR       | Adamas                |
| Norfloxacin                              | C <sub>16</sub> H <sub>18</sub> FN <sub>3</sub> O <sub>3</sub> /NOR                               | AR       | Macklin               |
| Sulfadiazine                             | C <sub>10</sub> H <sub>10</sub> N <sub>4</sub> O <sub>2</sub> S                                   | AR       | Rhawn                 |
| Tetracycline                             | C <sub>22</sub> H <sub>24</sub> N <sub>2</sub> O <sub>8</sub> /TCH                                | AR       | Macklin               |
| Sodium thiosulfate                       | Na <sub>2</sub> S <sub>2</sub> O <sub>3</sub>                                                     | AR       | Macklin               |
| Monopersulfate (potassium<br>persulfate) | K <sub>2</sub> O <sub>8</sub> S <sub>2</sub> /PMS                                                 | AR       | Alfa-Aesar            |
| 2,2,6,6-Tetramethylpiperidine            | C <sub>9</sub> H <sub>19</sub> N/TEMP                                                             | GC       | Aladdin               |
| p-Benzoquinone                           | C <sub>6</sub> H <sub>4</sub> O <sub>2</sub> /BQ                                                  | AR       | J&KScientific         |
| Tertiary Butyl Alcohol                   | C <sub>4</sub> H <sub>10</sub> O/TBA                                                              | AR       | Lingfeng,<br>Shanghai |
| Sodium iodate                            | NaIO <sub>3</sub>                                                                                 | AR       | Adamas                |
| Triethanolamine                          | C <sub>6</sub> H <sub>15</sub> NO <sub>3</sub> /TEOA                                              | GC       | Rhawn                 |
| 5,5-Dimethyl-1-pyrroline-N-<br>oxide     | C <sub>6</sub> H <sub>11</sub> NO/DMPO                                                            | AR       | J&KScientific         |
| Furfuryl alcohol                         | C <sub>5</sub> H <sub>6</sub> O <sub>2</sub> /FFA                                                 | AR       | Aladdin               |

**Table S2.** Equipments.

| Name                                                  | Type                          | Manufacturer        |
|-------------------------------------------------------|-------------------------------|---------------------|
| Analytical balances                                   | ME104E                        | METTLER TOLEDO      |
| Ultra-pure water machine                              | OKP-S010 standard             | Laike, Shanghai     |
| Nitrogen Cylinder                                     | /                             | Shenzhong, Shanghai |
| Vacuum Pump                                           | SHZ-D(III), circulating water | Jinfu, Shanghai     |
| Ultrasonic cleaner                                    | SK3200H                       | Kedao, Shanghai     |
| Magnetic Stirrer                                      | ZM-85-1                       | Zhiwei, Shanghai    |
| Temperature-controlled heating magnetic stirrer       | ZNCL-GS                       | Daojing, Shanghai   |
| Electrothermal constant temperature blast drying oven | DHG-9070A                     | Hualian, Shanghai   |
| Xenon lamp                                            | HXF300/300W                   | Jinyuan, Beijing    |
| Liquid chromatography                                 | SPD-M20A                      | SHIMADZU            |
| Muffle Furnace                                        | KSL-1200X                     | Kejin, Hefei        |

## 2. Texts

### Text S1. Characterization tools

The crystalline phase is determined by powder X-ray diffractometry (XRD), and the  $2\theta$  values are determined between  $5^\circ$  and  $80^\circ$  using a Rigaku Ultima IV diffractometer with Cu-K $\alpha$  radiation ( $\lambda = 1.5406 \text{ \AA}$ ).

The specific surface area Brunauer-Emmett-Teller (BET) is measured by N<sub>2</sub> adsorption using a fully automated surface micropore and physical adsorption meter (ASAP2020) at 77 K.

Scanning electron microscope (SEM) images of the catalysts are taken using a JEOL JSM 6360 LV microscope from Nippon Electronics Corporation. Low-resolution (TEM) and high-resolution (HRTEM) transmission electron microscope images of the catalysts are taken using a Nippon Electron JEM 1400 and a JEOL JEM 2100 microscope, respectively.

The leaching content of metal ions (Mn and W) are determined using ICP-AES. The leaching content of metal ions is tested by a 15 mL solutions after a normal degradation experiment, filtered by a 0.22-micron Teflon syringe filter. After filtering the catalyst, 40  $\mu$ L of Na<sub>2</sub>S<sub>2</sub>O<sub>3</sub> (250 mM) was added to the sample to terminate the reaction. Then we sent the sample to the school test center to measure the leaching concentration of specific elements. Inductively Coupled Plasma Atomic Emission Spectrometer (ICP-AES) analyzes under the following conditions: the instrument model is 167nm-785nm/725 purchased by America Agilent company. Analysis wavelength: 177nm-785nm; Optical resolution: 0.009nm (at 200nm); Grating line: 97.4L/mm, focal length: 400mm; Detection limit of typical elements (As, Cd, Cu, Zn): < 0.01mg/L.

The intensity signals of free radicals are determined by an electron paramagnetic resonance spectrometer (ESR). A Bruker model 100G-18KG/EMX-8/2.7 spectrometer is used for the determination with the following parameters: X-band microwave

bridge (X-band microwave bridge) at 9.3-9.9 GHz, L-band microwave bridge (L-band microwave bridge) at 30-400 KHz, X-band resonant cavity (X-band resonator) at 30-400 KHz, and X-band resonator (X-band resonator) at 30-400 KHz. band resonator (X-band resonator), and L-band resonator (L-band resonator).

X-ray photoelectron spectroscopy (XPS) of the catalysts is performed using a Perkin-Elmer PHI 5000C ESCA spectrometer to determine the chemical composition of the samples and the valence changes of the elements, in which the binding energy uses a C1s level of 284.8 eV as an internal standard.

The photoluminescence (PL) emission spectra of the catalysts are measured using Cary Eclipse at room temperature (25°C) through an excitation light of 400 nm.

The UV-Vis diffuse reflectance spectra (UV-Vis DRS) of the catalysts are measured using a Shimadzu UV-2600 spectrometer equipped with an integrating sphere assembly and using BaSO<sub>4</sub> as the reflectance sample.

The transient photocurrent response of the catalyst is carried out at room temperature using an electrochemical analyzer (Zahner, Zennium) on an electrochemical workstation with a standard three-electrode system. The working electrode is prepared by dispersing 5 mg of the sample in ethanol solution, sonicating it and taking 20 µL drops on the electrode and leaving it to dry. Samples are tested under visible light irradiation conditions (300 W xenon lamp) with 0.5 M Na<sub>2</sub>SO<sub>4</sub> solution as electrolyte using the prepared samples as working electrode (active area of about 0.5 cm<sup>2</sup>), platinum wire as counter electrode and saturated Hg/Hg<sub>2</sub>Cl<sub>2</sub> as reference electrode.

Electrochemical impedance (EIS) is also measured on electrochemical workstation with a working electrode for samples (prepared as above), a platinum wire as counter electrode, and a saturated Hg/Hg<sub>2</sub>Cl<sub>2</sub> as a reference electrode. A mixed aqueous solution of 0.025 M K<sub>3</sub>[Fe(CN)<sub>6</sub>], 0.025 M K<sub>4</sub>[Fe(CN)<sub>6</sub>], and 0.1 M KCl is used as the electrolyte.

Mott-Schottky measurements are also carried out on electrochemical workstation, and the reactive electrolytic cell is covered with a cardboard box to test different samples using a 0.5 M Na<sub>2</sub>SO<sub>4</sub> solution as the electrolyte.

High-performance liquid chromatography (HPLC) analyzes under the following conditions: a 0.2% (v/v) aqueous formic acid solution and acetonitrile as mobile phase A and B, methanol and water as rinse solution, at a flow rate of 1.0 mL/min, and an injection volume of 20 μL. The instrument model is LC-2030C 3D Plus (SHIMADZU) and the UPLC column is a Shim-pack GIST C18 Column (2.1×100mm) from SHIMADZU at a column temperature of 302 K (30°C). The wavelengths of detection for levofloxacin, norfloxacin, sulphadoxine-pyrimethamine and tetracycline are 294 nm, 278 nm, 264 nm, and 355 nm, respectively.

Degradation products by ultra-performance liquid chromatography-tandem mass spectrometry (LC-MS/MS) analyzes under the following conditions: Molecular weight range 50-6000, resolution up to 140000. The instrument model is Q-Exactive plus. The ion source contains ESI ion source, APCI ion source and nanoESI ion source. The mass analyser adopts the combination of quadrupole and electrostatic field orbit trap in series. The liquid phase system is equipped with dual systems of ultra-high

pressure liquid chromatography and nanoliter liquid chromatography. The secondary mass spectrometry fragmentation mode (MS/MS): HCD. The data system (Software) used Xcalibur data acquisition system, MASS FRONTIER structure analysis software, COMPND DISC metabolomics software, PROTEOME DISCOVERER proteomics software, TRACEFINDER quantification software, and BIOPHARMA molecular weight deconvolution software, etc. Mass range 50-6000m/z; Instrument resolution: 140,000 FWHM ( $m/z \leq 200$ ),  $\geq 4$  levels adjustable; High-resolution mass spectrometry acquisition rate: up to 12Hz; Mass axis stability: after the equipment calibrates once, the mass axis will not be corrected within 48 consecutive hours, and the mass accuracy is  $\leq 2$ ppm; Sensitivity: Full Scan ( $m/z$ .) 100-900) Sensitivity (resolution  $\geq 70000$  FWHM): 50fg reserpine injection,  $S/N > 500:1$ , selective ion scanning SIM sensitivity (resolution  $\geq 70000$  FWHM): 50fg reserpine injection  $S/N > 1000:1$ , MS/MS sensitivity (resolution  $\geq 70000$  FWHM): 50fg reserpine injection,  $S/N > 1000:1$ .

### **Text S2. Quenching experiments**

0.8142 mL of methanol (400 mM), 1.9518 mL of tert-butanol (400 mM), 1.764 mL of furfuryl alcohol (400 mM), 10.8 mg of p-benzoquinone (2 mM), 19.8 mg of  $\text{NaIO}_3$  (2 mM), and 2.6546 mL of triethanolamine (400 mM) are added prior to the start of the reaction to quench  $\text{SO}_4^{\bullet-}$  and  $\bullet\text{OH}$ ,  $\bullet\text{OH}$ ,  $^1\text{O}_2$ ,  $\bullet\text{O}_2^-$ ,  $e^-$  and  $h^+$ .

Determination of the electron paramagnetic resonance (ESR) signals of  $\text{SO}_4^{\bullet-}$ ,  $^1\text{O}_2$ ,  $\bullet\text{O}_2^-$  and  $\bullet\text{OH}$  need to be carried out in a separate system as follows:

5 mg of catalyst powder and 50  $\mu\text{L}$  of TEMP are added to 5 mL of aqueous solution. 40  $\mu\text{L}$  of PMS (0.05 mol/L) and light are added after 1 min, and the solution

is filtered and injected into a capillary tube after 3 min to measure the ESR signals of  $^1\text{O}_2$ . Another set of PMS only without catalyst is measured as a control.

5 mg of catalyst powder and 50  $\mu\text{L}$  of DMPO are added to 5 mL of methanol solution. 40  $\mu\text{L}$  of PMS (0.05 mol/L) and light are added after 1 min, and the solution is filtered and injected into a capillary tube after 3 min to measure the ESR signals of  $\bullet\text{O}_2^-$ . Another set of PMS only without catalyst is measured as a control.

5 mg of catalyst powder and 50  $\mu\text{L}$  of DMPO are added to 5 mL of aqueous solution. 40  $\mu\text{L}$  of PMS (0.05 mol/L) and light are added after 1 min, and the solution is filtered and injected into a capillary tube after 3 min to measure the ESR signals of  $\text{SO}_4^{\bullet-}$  and  $\bullet\text{OH}$ . Another set of PMS only without catalyst is measured as a control.



### 3. Figures

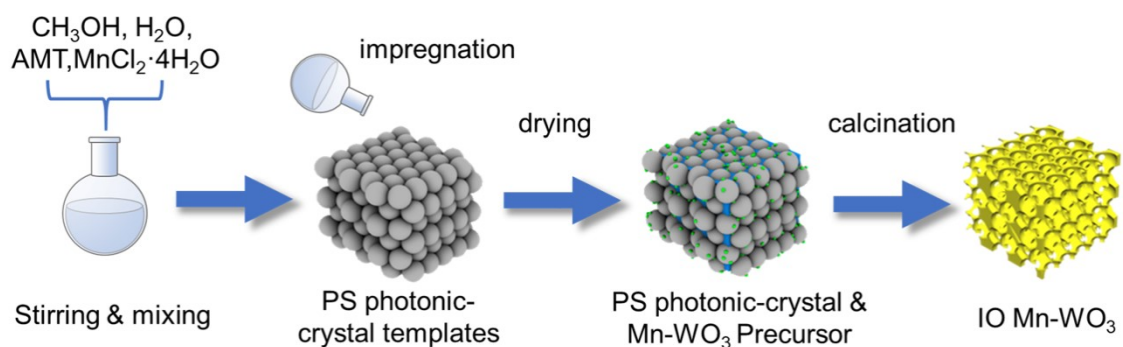

**Fig. S1.** The process of catalyst preparation.

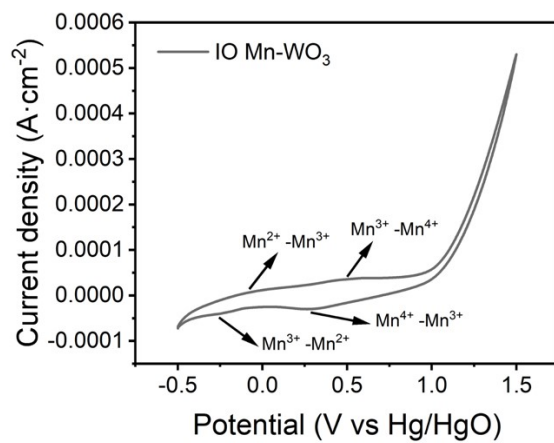

**Fig. S2.** CV curve of IO Mn-WO<sub>3</sub>.

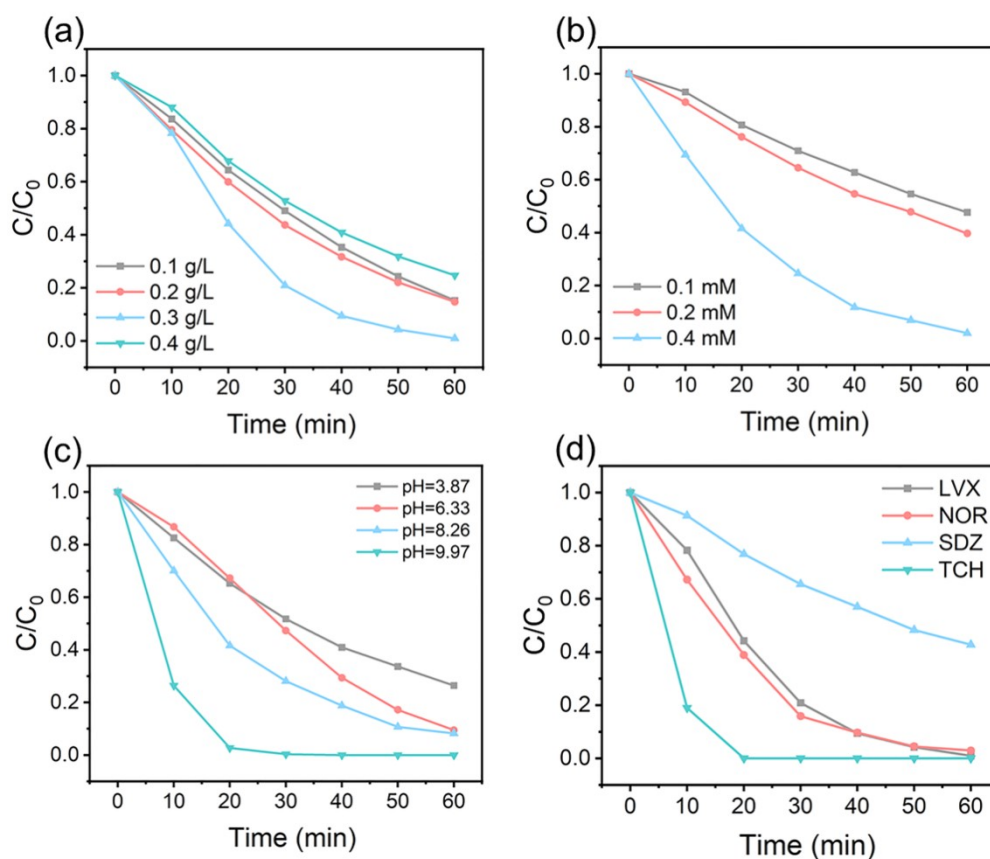

**Fig. S3.** The influence of different factors on the LVX degradation efficiency: (a) catalyst dosage; (b) PMS concentration; (c) pH; (d) different antibiotics. Reaction conditions: [Catalysts] = 0.3 g/L, [PMS]<sub>0</sub> = 0.4 mM, [LVX]<sub>0</sub> = 20 mg/L, with visible light irradiation.

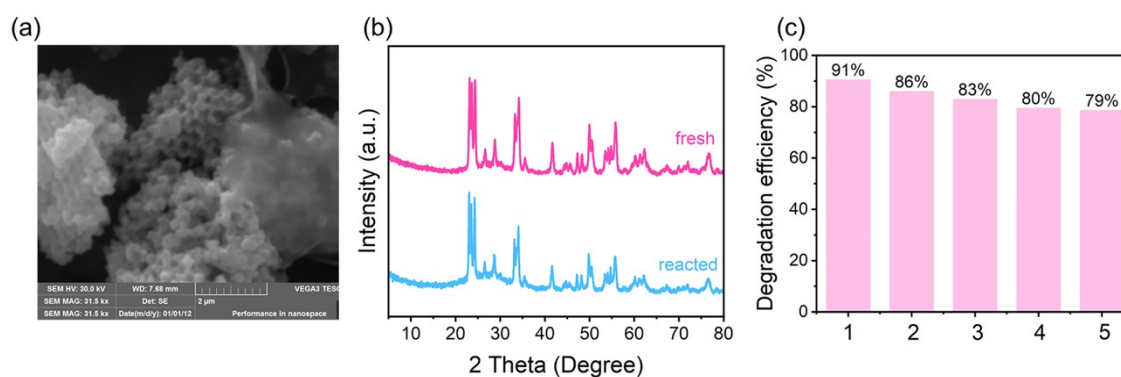

**Fig. S4.** (a) SEM image of the catalyst after the reaction; (b) XRD patterns of the catalyst before and after the reaction; (c) cycling tests. Reaction conditions: [Catalysts] = 0.3 g/L, [PMS]<sub>0</sub> = 0.4 mM, [LVX]<sub>0</sub> = 20 mg/L, with visible light irradiation.

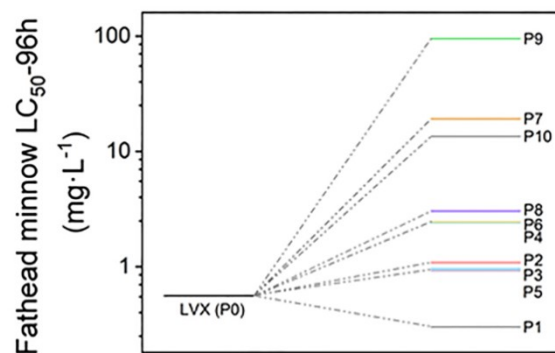

**Fig. S5.** Toxicity assessment of reaction intermediates (using fathead minnow  $LC_{50-96h}$  as an indicator).

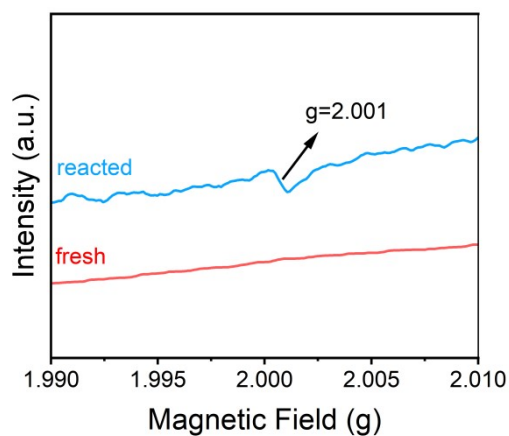

**Fig. S6.** Electron spin resonance (ESR) spectra of IO Mn- $WO_3$  before and after reactions.

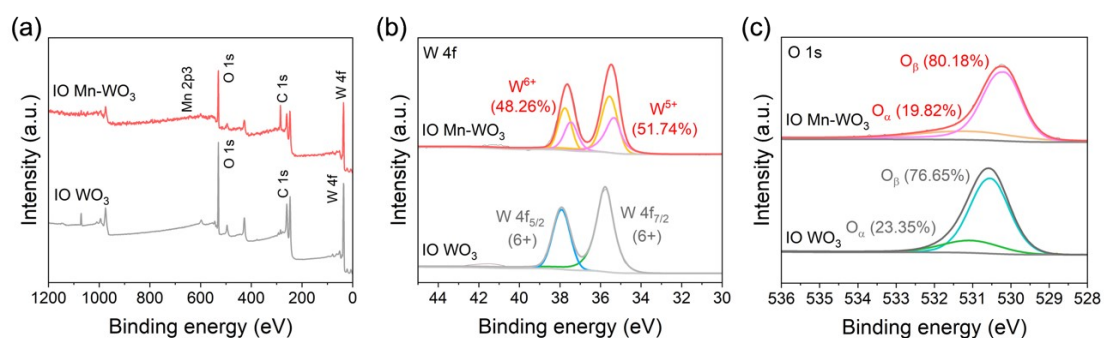

**Fig. S7.** XPS spectra of IO Mn- $WO_3$  and IO  $WO_3$ . (a) full XPS survey; (b) W 4f; (c) O 1s.

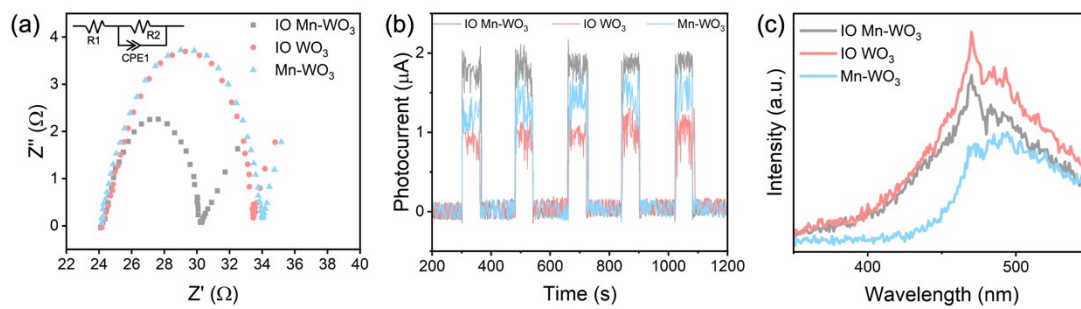

**Fig. S8.** (a) EIS-Nyquist plots of different catalysts; (b) transient photocurrent response plots under visible light irradiation; (c) photoluminescence (PL) spectra (excitation wavelength at room temperature: 400 nm)

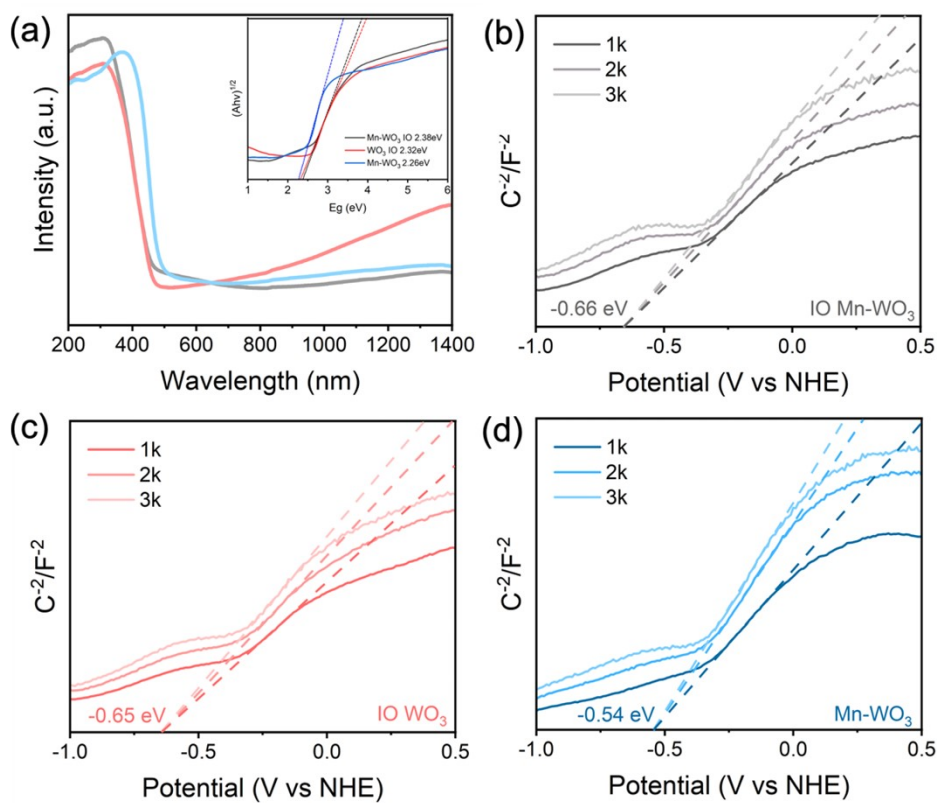

**Fig. S9.** (a) UV-visible diffuse reflectance spectra; (b-d) Mott-Schottky plots for different catalysts.

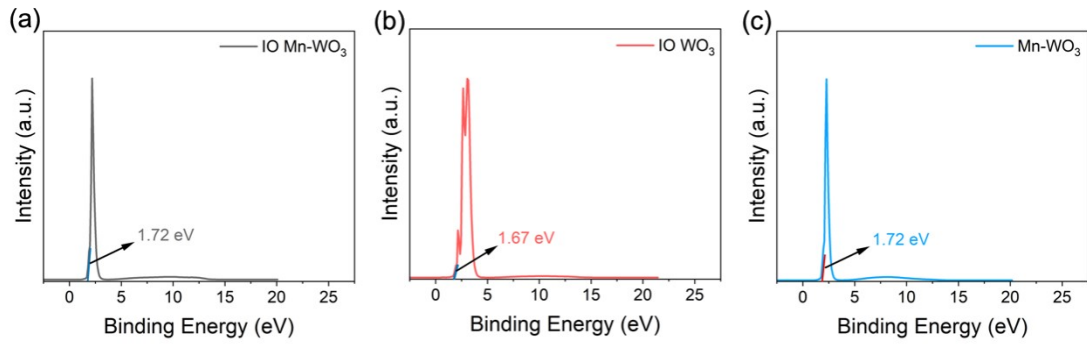

**Fig. S10.** Valence band XPS spectrum of (a) IO Mn-WO<sub>3</sub>, (b) IO WO<sub>3</sub> and (c) Mn-WO<sub>3</sub>.

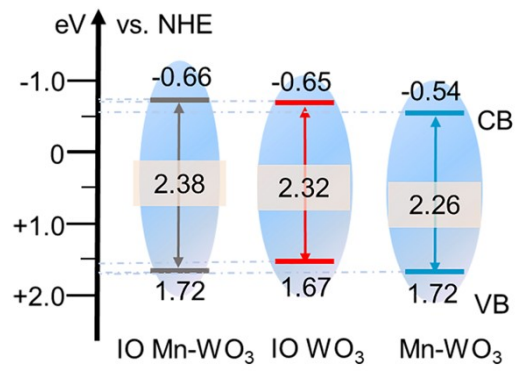

**Fig. S11.** Energy band structure of the three samples.

#### 4. Tables

Table. S3. The electrochemical impedance spectroscopy (EIS) of IO Mn-WO<sub>3</sub>, IO WO<sub>3</sub> and Mn-WO<sub>3</sub>

|              | IO Mn-WO <sub>3</sub> | IO WO <sub>3</sub> | Mn-WO <sub>3</sub> |
|--------------|-----------------------|--------------------|--------------------|
| R1/ $\Omega$ | 4.6                   | 4.6                | 4.6                |
| R2/ $\Omega$ | 6                     | 9.5                | 10                 |
